# Supplementary material for: The genome-wide multi-layered architecture of chromosome pairing in early Drosophila embryos
Source: PubMed Central journal article supplement (PMC6776651; doi:10.1038/s41467-019-12211-8), 2019-10-03
Supplement: 41467_2019_12211_MOESM4_ESM.pdf [file 41467_2019_12211_MOESM4_ESM.pdf]

## Description of Additional Supplementary File

File name: Supplementary Data 1

Description: Statistics summary for the haplotype-resolved mapping and duplicate removal using mammalian data.

The number of read pairs is provided for each replicate from Ke *et al.*<sup>26</sup> and Du *et al.*<sup>25</sup> datasets.

Total raw read pairs ('Total') include unmapped read pairs with multiple or low score alignments comprising also reads without SNVs ('Total\_unmapped'), and read pairs where only single side ('Total\_ss\_mapped') or both sides are mapped ('Total\_mapped'). Total mapped read pairs contain non-duplicates and discarded PCR duplicates. Non-duplicates are subdivided into *cis* and *trans* read pairs.
